# Supplementary material for: Identification of a Favorable Prognostic Subgroup in Oral Squamous Cell Carcinoma: Characterization of ITGB4/PD-L1high with CD8/PD-1high
Source: MDPI journal article supplement (doi:10.3390/biom13061014), 2023-06-19
Supplement: s1 [file s1]

## Supplementary Figures

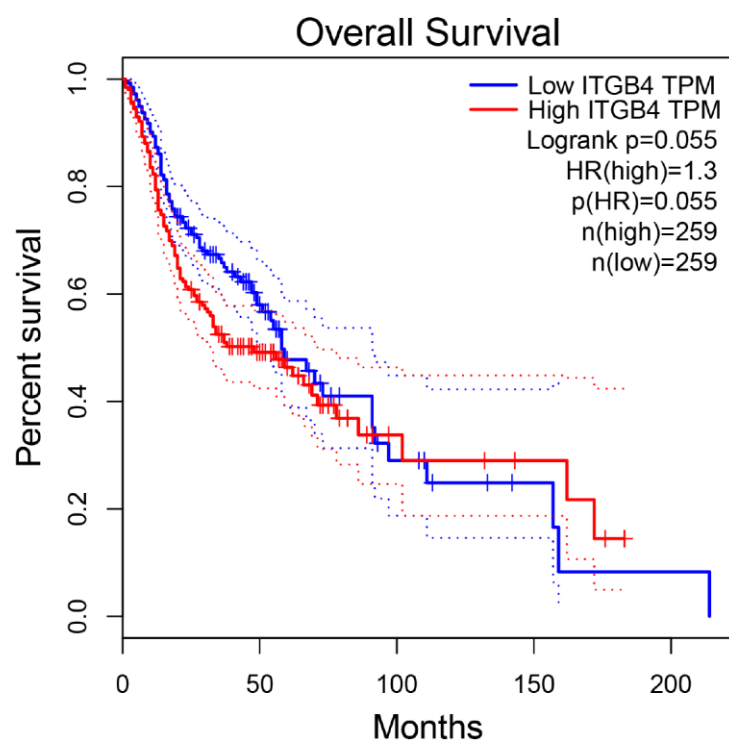

Supplementary Figure S1

The survival curve of ITGB4 in GEPIA database.

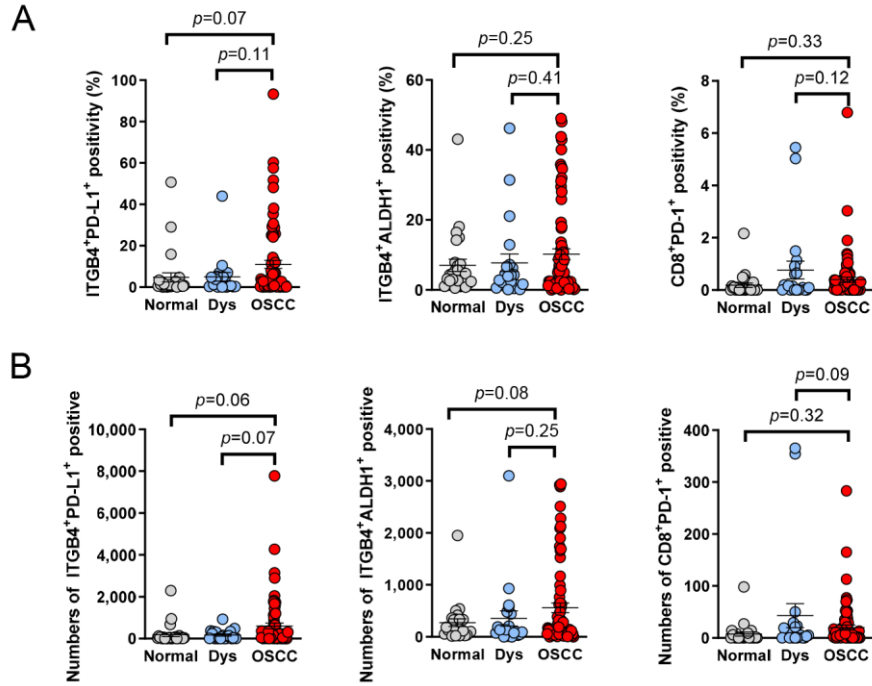

Supplementary Figure S2

The intensity analysis of double positive cells in OSCC. The positivity (A) and positive numbers (B) of ITGB4<sup>+</sup>PD-L1<sup>+</sup> cancer cells, ITGB4<sup>+</sup>ALDH1<sup>+</sup> cancer cells and CD8<sup>+</sup>PD-1<sup>+</sup> T cells in OSCC specimens as compared with normal mucosa and dysplasia based on the multiplex immunohistochemistry (mIHC).

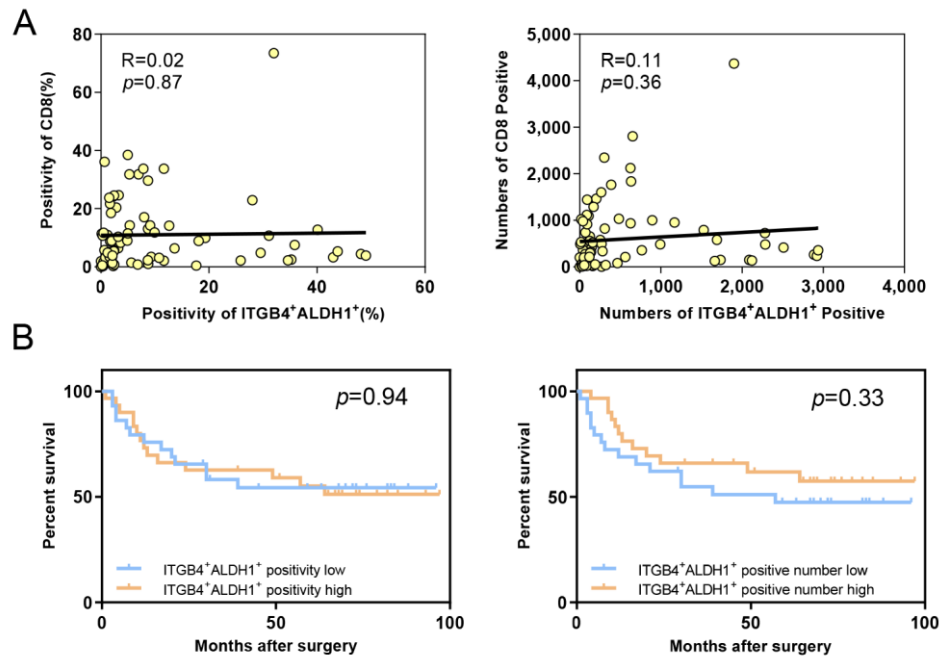

### Supplementary Figure S3

The relationship and prognosis analysis of PD104<sup>+</sup>ALDH1<sup>+</sup> cancer cells.

A The correlation analysis between PD104<sup>+</sup>ALDH1<sup>+</sup> cancer cells and CD8<sup>+</sup> T cells (positivity  $p=0.87$ , positive number  $p=0.36$ ). B The Kaplan-Meier curve of overall survival of OSCC patients with high ITGB4<sup>+</sup>ALDH1<sup>+</sup> cancer cells and low ITGB4<sup>+</sup>ALDH1<sup>+</sup> cancer cells. (left: positivity  $p=0.94$ ; right: positive number  $p=0.33$ ).

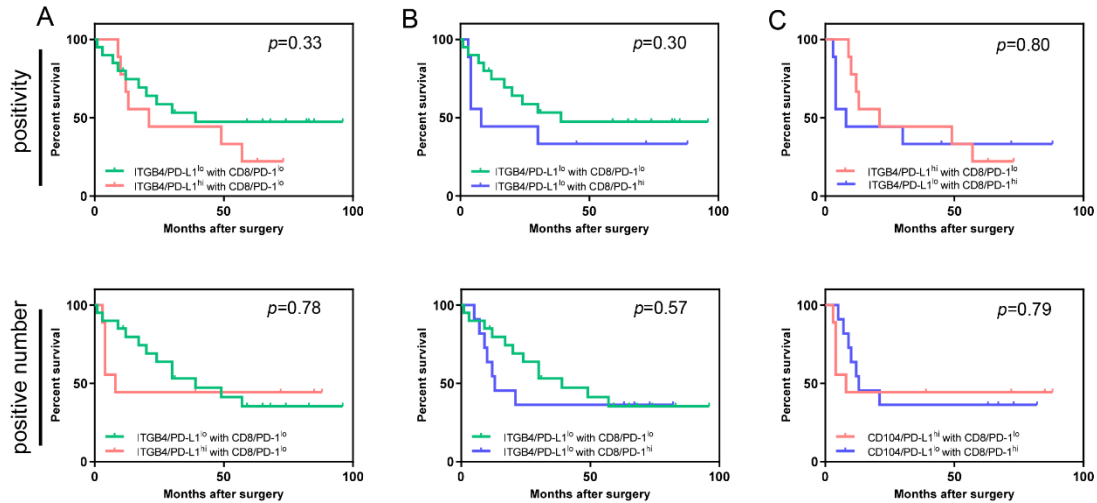

Supplementary Figure S4

The survival analysis among other subgroups of OSCC patients. The Kaplan-Meier curve of overall survival of OSCC patients between (A) ITGB4/PD-L1<sup>high</sup> with CD8/PD-1<sup>low</sup> and ITGB4/PD-L1<sup>low</sup> with CD8/PD-1<sup>low</sup> (upper: positivity  $p=0.33$ , lower: positive number  $p=0.78$ ), (B) ITGB4/PD-L1<sup>low</sup> with CD8/PD-1<sup>high</sup> and ITGB4/PD-L1<sup>low</sup> with CD8/PD-1<sup>low</sup> (upper: positivity  $p=0.30$ , lower: positive number  $p=0.57$ ), (C) ITGB4/PD-L1<sup>low</sup> with CD8/PD-1<sup>high</sup> and ITGB4/PD-L1<sup>high</sup> with CD8/PD-1<sup>low</sup> (upper: positivity  $p=0.80$ , lower: positive number  $p=0.79$ ).

Supplementary Table S1. Clinicopathological features of 60 primary oral squamous cell carcinomas with follow-up in this study.

| No. | Gender | Age | TNM stage | Grade | Alive (0) or<br>Dead (1) | Survival time<br>(months) |
|-----|--------|-----|-----------|-------|--------------------------|---------------------------|
| 1   | male   | 49  | T2N0M0    | I     | 0                        | 74                        |
| 2   | male   | 50  | T2N1M0    | III   | 1                        | 49                        |
| 3   | male   | 50  | T3N1M0    | II    | 1                        | 9                         |
| 4   | female | 43  | T2N0M0    | II    | 0                        | 72                        |
| 5   | female | 65  | T3N0M0    | II    | 1                        | 13                        |
| 6   | female | 73  | T3N0M0    | II    | 0                        | 68                        |
| 7   | male   | 40  | T3N2M0    | II    | 1                        | 4                         |
| 8   | male   | 38  | T2N1M0    | I     | 0                        | 31                        |
| 9   | male   | 44  | T1N0M0    | II    | 0                        | 59                        |
| 10  | female | 67  | T2N0M0    | II    | 0                        | 51                        |
| 11  | male   | 73  | T2N1M0    | I     | 0                        | 45                        |
| 12  | male   | 61  | T1N0M0    | II    | 1                        | 39                        |
| 13  | male   | 68  | T2N0M0    | II    | 0                        | 39                        |
| 14  | female | 57  | T1N0M0    | II    | 0                        | 65                        |
| 15  | male   | 60  | T3N0M0    | III   | 1                        | 3                         |
| 16  | male   | 40  | T2N1M0    | II    | 0                        | 97                        |
| 17  | male   | 39  | T2N0M0    | II    | 0                        | 96                        |
| 18  | male   | 77  | T1N0M0    | III   | 1                        | 5                         |
| 19  | male   | 68  | T2N2M0    | I     | 0                        | 93                        |
| 20  | male   | 63  | T3N1M0    | I     | 1                        | 20                        |
| 21  | male   | 43  | T2N0M0    | III   | 1                        | 30                        |
| 22  | female | 78  | T4N2M0    | II    | 0                        | 88                        |
| 23  | male   | 57  | T3N1M0    | II    | 1                        | 0                         |
| 24  | male   | 72  | T4N0M0    | II    | 0                        | 85                        |
| 25  | male   | 62  | T4N1M0    | II    | 1                        | 24                        |
| 26  | male   | 80  | T4N0M0    | II    | 1                        | 12                        |
| 27  | male   | 70  | T4N1M0    | II    | 0                        | 84                        |
| 28  | male   | 72  | T2N2M0    | II    | 0                        | 29                        |
| 29  | male   | 57  | T3N1M0    | II    | 0                        | 83                        |
| 30  | male   | 53  | T3N1M0    | IIII  | 1                        | 12                        |
| 31  | male   | 55  | T3N0M0    | II    | 1                        | 8                         |
| 32  | female | 66  | T1N1M0    | III   | 1                        | 16                        |
| 33  | male   | 62  | T1N0M0    | II    | 0                        | 82                        |
| 34  | male   | 46  | T4N0M0    | II    | 0                        | 82                        |
| 35  | male   | 54  | T4N1M0    | I     | 1                        | 11                        |
| 36  | male   | 54  | T2N1M0    | I     | 0                        | 79                        |
| 37  | male   | 41  | T2N1M0    | III   | 0                        | 76                        |
| 38  | male   | 46  | T2N1M0    | II    | 1                        | 7                         |

|    |        |    |        |     |   |    |
|----|--------|----|--------|-----|---|----|
| 39 | male   | 62 | T2N0M0 | III | 1 | 4  |
| 40 | male   | 49 | T2N0M0 | II  | 0 | 73 |
| 41 | male   | 78 | T2N1M0 | I   | 0 | 73 |
| 42 | male   | 63 | T4N2M0 | II  | 1 | 64 |
| 43 | male   | 48 | T3N0M0 | II  | 0 | 70 |
| 44 | female | 65 | T4N2M0 | I   | 0 | 69 |
| 45 | male   | 57 | T4N1M0 | III | 1 | 57 |
| 46 | female | 58 | T2N0M0 | II  | 0 | 68 |
| 47 | male   | 35 | T2N0M0 | II  | 0 | 68 |
| 48 | male   | 50 | T4N0M0 | III | 0 | 67 |
| 49 | male   | 48 | T2N1M0 | II  | 0 | 11 |
| 50 | male   | 57 | T2N0M0 | II  | 0 | 67 |
| 51 | male   | 52 | T2N0M0 | III | 1 | 21 |
| 52 | male   | 59 | T2N2M0 | II  | 1 | 9  |
| 53 | female | 46 | T2N0M0 | II  | 1 | 30 |
| 54 | male   | 51 | T4N1M0 | I   | 0 | 65 |
| 55 | male   | 61 | T1N0M0 | II  | 1 | 1  |
| 56 | male   | 46 | T4N1M0 | II  | 0 | 63 |
| 57 | male   | 47 | T2N2M0 | II  | 1 | 3  |
| 58 | male   | 63 | T4N2M0 | II  | 1 | 4  |
| 59 | male   | 61 | T2N0M0 | III | 1 | 10 |
| 60 | male   | 69 | T2N2M0 | II  | 1 | 17 |
